# Supplementary material
Source: PubMed Central journal article supplement (PMC5113107)
Supplement: mt2016141x4.pdf [file mt2016141x4.pdf]

**Table S2. Chemotherapy and CD19 mAb treatment**

| No. | Treatment before<br>1 <sup>st</sup> mAb application    | Days between<br>pretreatment<br>and start of<br>mAb | Bone marrow<br>status prior to<br>mAb treatment | MRD<br>prior to<br>mAb | MRD<br>post mAb        | Lowest<br>MRD<br>level<br>after 1 <sup>st</sup><br>mAb | Additional<br>HSCT<br>after 1 <sup>st</sup> mAb | Additional HSCT<br>after mAb response | MRD<br>prior to last HSCT | MRD<br>post last HSCT |
|-----|--------------------------------------------------------|-----------------------------------------------------|-------------------------------------------------|------------------------|------------------------|--------------------------------------------------------|-------------------------------------------------|---------------------------------------|---------------------------|-----------------------|
| 1   | clofarabine, cyclophosphamide,<br>etoposide            | 53                                                  | M1, MRD                                         | 5,00E-03               | negative               | negative                                               | Yes                                             | Yes                                   | 5,00E-03                  | negative              |
| 2   | haploidentical HSCT with<br>myeloablative conditioning | 22                                                  | M1, MRD                                         | 1,00E-06               | negative               | negative                                               | No                                              | No                                    | 1,00E+00                  | 1,00E-06              |
| 3   | clofarabine, cyclophosphamide,<br>etoposide            | 23                                                  | M1, MRD                                         | 1,00E-03               | negative               | negative                                               | Yes                                             | Yes                                   | 5,00E-05                  | 5,00E-03              |
| 4   | MSD HSCT with<br>myeloablative conditioning            | 461                                                 | M1, MRD                                         | 5,00E-03               | 5,00E-05               | 5,00E-06                                               | Yes                                             | Yes                                   | 5,00E-04                  | 5,00E-04              |
| 5   | vincristine and bortezomib i.v.,<br>methotrexate i.th. | 38                                                  | M1, MRD                                         | 3,00E-04               | negative               | negative                                               | Yes                                             | Yes                                   | 5,00E-05                  | negative              |
| 6   | daunorubicin, bortezomib                               | 7                                                   | M1, MRD                                         | 7,00E-04               | 1,00E-06               | 5,00E-06                                               | Yes                                             | No                                    | 1,00E-06                  | negative              |
| 7   | fludarabine, daunorubicin<br>* cytarabine, melphalan   | 45,<br>* 32                                         | M2<br>* M1, MRD                                 | 1,50E-01<br>* 1,10E-02 | 1,50E-01<br>* 1,10E-06 | 1,10E-06                                               | Yes                                             | No                                    | 1,00E+00                  | 1,10E-02              |
| 8   | imatinib, ongoing                                      | 0                                                   | M1, MRD                                         | 3,00E-03               | negative               | negative                                               | Yes                                             | Yes                                   | 1,00E-04                  | negative              |
| 9   | dasatinib, ongoing                                     | 0                                                   | M1, MRD                                         | 8,40E-04               | negative               | negative                                               | Yes                                             | Yes                                   | negative                  | negative              |
| 10  | haploidentical HSCT with<br>myeloablative conditioning | 13                                                  | M1, MRD                                         | 1,00E-03               | negative               | negative                                               | No                                              | Yes                                   | 4,00E-02                  | 1,00E-03              |
| 11  | clofarabine, cyclophosphamide,<br>etoposide            | 28                                                  | M1, MRD                                         | 1,41E-02               | 9,30E-03               | negative                                               | Yes                                             | not applicable                        | 1,00E-06                  | 1,00E-06              |
| 12  | daunorubicin, fludarabine,<br>cytarabine and G-CSF     | 43                                                  | M1, MRD                                         | 1,00E-06               | 1,00E-04               | negative                                               | Yes                                             | not applicable                        | 1,00E-04                  | negative              |
| 13  | cytarabine, etoposide                                  | 28                                                  | M1, MRD                                         | 5,00E-04               | 5,00E-04               | negative                                               | Yes                                             | not applicable                        | 5,00E-04                  | 5,00E-04              |
| 14  | clofarabine, cyclophosphamide,<br>etoposide            | 32                                                  | M1, MRD                                         | 5,00E-04               | 5,00E-03               | 5,00E-06                                               | Yes                                             | not applicable                        | 5,00E-03                  | 5,00E-06              |

In patient #7 \* indicates the second attempt of treatment after additional cytoreductive chemotherapy with cytarabine and melphalan.

All corresponding data is indicated. Minimal residual disease (MRD) was defined negative, if below qualitative detection threshold.

Monoclonal antibody (mAb). Hematopoietic stem cell transplantation (HSCT). Bone marrow status was defined according to M1 <

5% blasts, M2 5-25% blasts, M3 > 25% blasts [49].

1. Raetz, EA, Borowitz, MJ, Devidas, M, Linda, SB, Hunger, SP, Winick, NJ, et al. (2008). Reinduction platform for children with first marrow relapse of acute lymphoblastic Leukemia: A Children's Oncology Group Study[corrected]. J Clin Oncol **26**: 3971-3978.
